# Supplementary material
Source: publisher figshare collection journal article supplement (https://frontiersin.figshare.com/ndownloader/files/28470237)

**Supplementary Figure 1: Hierarchical classification of rs-fMRI components' and microstates' time courses based on their cross-correlation across individuals in controls only**

Cluster dendrograms for the time courses of rs-fMRI components and the microstates. The lower left triangular matrix indicates the cross-correlation of time courses, the upper right triangular matrix the partial correlations of time courses.

Clustering was performed only across the controls.

Supplementary Figure 1a: Clustering based on number of assignments of microstates per TR

Supplementary Figure 1b: Clustering based on similarity of EEG time courses with each microstate per TR

**Supplementary Figure 1: Hierarchical classification of rs-fMRI components' and microstates' time courses based on their cross-correlation across individuals in controls only**

**Supplementary Figure 1a: Clustering based on number of assignments of microstates per TR**

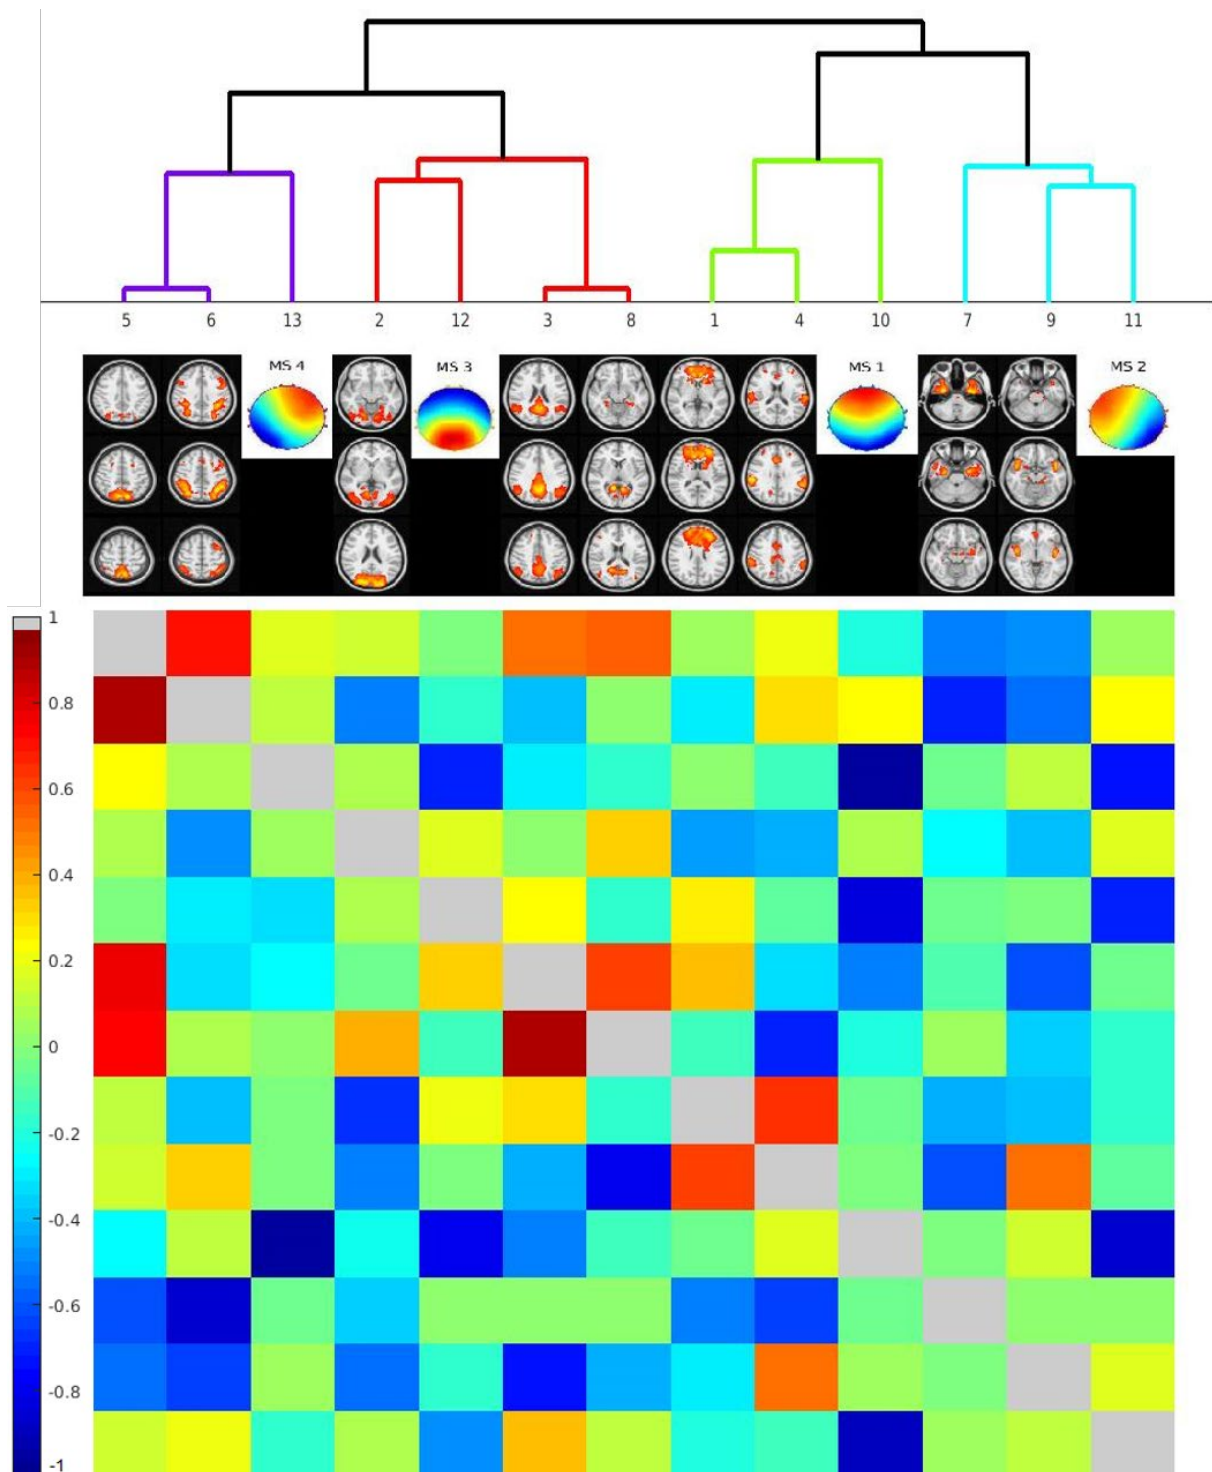

**Supplementary Figure 1b: Clustering based on similarity of EEG time courses with each microstate per TR**

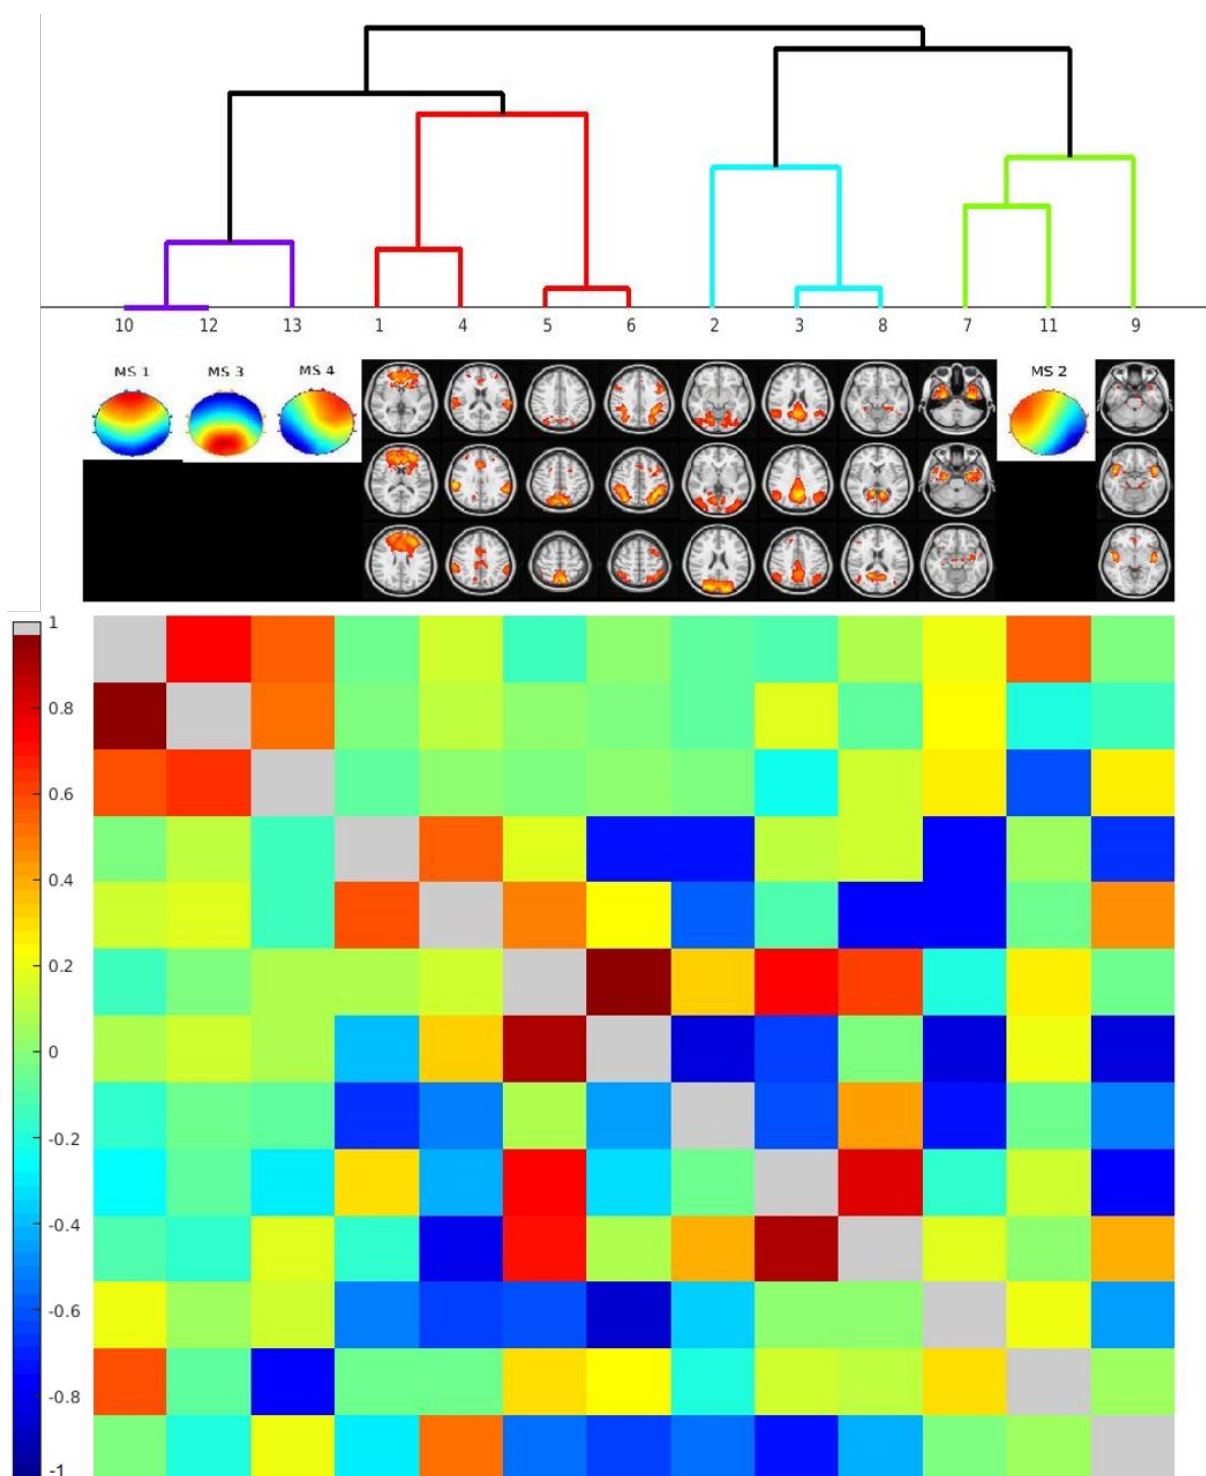

Supplement: Supplementary file [file 28470237]
